# Supplementary material
Source: PubMed Central journal article supplement (PMC7883684)
Supplement: mmc1.pdf [file mmc1.pdf]

Supplementary table. Ongoing studies registered in the ClinicalTrials.gov platform using the search terms Covid-19, SARS-CoV-2 and endothelium.

| NCT Number  | Title                                                                                                          | Status                 | Interventions                                                                                                                     | Study Type     | URL                                                                                                   |
|-------------|----------------------------------------------------------------------------------------------------------------|------------------------|-----------------------------------------------------------------------------------------------------------------------------------|----------------|-------------------------------------------------------------------------------------------------------|
| NCT04468412 | Influence of COVID-19 on Vascular Endothelial Function                                                         | Recruiting             | Diagnostic Test: Carotid Artery Reactivity Testing                                                                                | Observational  | <a href="https://ClinicalTrials.gov/show/NCT04468412">https://ClinicalTrials.gov/show/NCT04468412</a> |
| NCT04409847 | COVID-19 Blood Pressure Endothelium Interaction Study (OBELIX)                                                 | Recruiting             | Diagnostic Test: ABPM Diagnostic Test: ECG Diagnostic Test: FMD Diagnostic Test: PWV Diagnostic Test: Rarefaction                 | Observational  | <a href="https://ClinicalTrials.gov/show/NCT04409847">https://ClinicalTrials.gov/show/NCT04409847</a> |
| NCT04357847 | Assessment of Endothelial and Haemostatic Changes During Severe SARS-CoV-2 Infection                           | Recruiting             | N.A.                                                                                                                              | Observational  | <a href="https://ClinicalTrials.gov/show/NCT04357847">https://ClinicalTrials.gov/show/NCT04357847</a> |
| NCT04408365 | Endothelial Function, Inflammation and Organ Dysfunction in COVID-19                                           | Not yet recruiting     | N.A.                                                                                                                              | Observational  | <a href="https://ClinicalTrials.gov/show/NCT04408365">https://ClinicalTrials.gov/show/NCT04408365</a> |
| NCT04343053 | Pro-thrombotic Status in Patients With SARS-Cov-2 Infection                                                    | Active, not recruiting | Other: SARS-Cov-2 infection                                                                                                       | Interventional | <a href="https://ClinicalTrials.gov/show/NCT04343053">https://ClinicalTrials.gov/show/NCT04343053</a> |
| NCT04377997 | Safety and Efficacy of Therapeutic Anticoagulation on Clinical Outcomes in Hospitalized Patients With COVID-19 | Not yet recruiting     | Drug: Enoxaparin                                                                                                                  | Interventional | <a href="https://ClinicalTrials.gov/show/NCT04377997">https://ClinicalTrials.gov/show/NCT04377997</a> |
| NCT04448743 | Role of Microparticles in Covid-19 Infection                                                                   | Not yet recruiting     | Other: Blood sample                                                                                                               | Observational  | <a href="https://ClinicalTrials.gov/show/NCT04448743">https://ClinicalTrials.gov/show/NCT04448743</a> |
| NCT04420741 | Infusion of Prostacyclin (Iloprost) vs Placebo for 72-hours in COVID-19 Patients With Respiratory Failure      | Recruiting             | Drug: Iloprost Drug: Isotonic saline                                                                                              | Interventional | <a href="https://ClinicalTrials.gov/show/NCT04420741">https://ClinicalTrials.gov/show/NCT04420741</a> |
| NCT04348383 | Defibrotide as Prevention and Treatment of Respiratory Distress and Cytokine Release Syndrome of Covid 19.     | Recruiting             | Drug: Defibrotide 25 mg/kg 24 hours continuous infusion for 15 days Drug: Placebo 250 cc 24 hours continuous infusion for 15 days | Interventional | <a href="https://ClinicalTrials.gov/show/NCT04348383">https://ClinicalTrials.gov/show/NCT04348383</a> |
| NCT04410263 | Microbiota in COVID-19 Patients for Future Therapeutic and Preventive Approaches                               | Recruiting             | Diagnostic Test: Sampling (EDTA blood, pharyngeal and nose swabs, bronchoalveolar lavage, urine)                                  | Observational  | <a href="https://ClinicalTrials.gov/show/NCT04410263">https://ClinicalTrials.gov/show/NCT04410263</a> |
| NCT04406545 | Microvascular Flow and Reactivity in Patients Presenting in the Acute Phase of COVID-19.                       | Recruiting             | Other: evaluation of skin microvascular flow and reactivity                                                                       | Observational  | <a href="https://ClinicalTrials.gov/show/NCT04406545">https://ClinicalTrials.gov/show/NCT04406545</a> |
| NCT04361422 | Isotretinoin in Treatment of COVID-19                                                                          | Not yet recruiting     | Drug: Isotretinoin Only Product in Oral Dose Form                                                                                 | Interventional | <a href="https://ClinicalTrials.gov/show/NCT04361422">https://ClinicalTrials.gov/show/NCT04361422</a> |
| NCT04483830 | Sulodexide in the Treatment of Early Stages of COVID-19                                                        | Recruiting             | Drug: Sulodexide Drug: Placebo                                                                                                    | Interventional | <a href="https://ClinicalTrials.gov/show/NCT04483830">https://ClinicalTrials.gov/show/NCT04483830</a> |
| NCT04414267 | Bacillus Calmette-guérin Vaccination to Prevent COVID-19                                                       | Recruiting             | Biological: BCG vaccine Biological: Placebo                                                                                       | Interventional | <a href="https://ClinicalTrials.gov/show/NCT04414267">https://ClinicalTrials.gov/show/NCT04414267</a> |
| NCT04367662 | Study of the Vascular Compartment and Hypercoagulability During Coronavirus Infection COVID-19                 | Completed              | Procedure: blood sampling                                                                                                         | Interventional | <a href="https://ClinicalTrials.gov/show/NCT04367662">https://ClinicalTrials.gov/show/NCT04367662</a> |
| NCT04443673 | Glycine Supplement for Severe COVID-19                                                                         | Recruiting             | Dietary Supplement: Glycine                                                                                                       | Interventional | <a href="https://ClinicalTrials.gov/show/NCT04443673">https://ClinicalTrials.gov/show/NCT04443673</a> |
| NCT04508933 | Comparison of Extra Vascular Lung Water Index in Covid-19 ARDS and "Typical"ARDS Patients                      | Not yet recruiting     | Device: Extravascular Lung Water Index Device: Pulmonary Vascular Permeability Index                                              | Observational  | <a href="https://ClinicalTrials.gov/show/NCT04508933">https://ClinicalTrials.gov/show/NCT04508933</a> |
| NCT04480632 | Therapeutic Plasmapheresis in Critically Ill Adult Patients With COVID-19 Confirmed Diagnosis                  | Not yet recruiting     | Biological: Convalescent plasma                                                                                                   | Interventional | <a href="https://ClinicalTrials.gov/show/NCT04480632">https://ClinicalTrials.gov/show/NCT04480632</a> |
| NCT04382794 | Sitagliptin Treatment in Diabetic COVID-19 Positive Patients                                                   | Completed              | Drug: Retrospective case-control analysis                                                                                         | Observational  | <a href="https://ClinicalTrials.gov/show/NCT04382794">https://ClinicalTrials.gov/show/NCT04382794</a> |
| NCT04326790 | The GReek Study in the Effects of Colchicine in Covid-19 cOmplications Prevention                              | Recruiting             | Drug: Colchicine Drug: Standard treatment                                                                                         | Interventional | <a href="https://ClinicalTrials.gov/show/NCT04326790">https://ClinicalTrials.gov/show/NCT04326790</a> |

|             |                                                                                                                                     |                        |                                                                                                                              |                |                                                                                                       |
|-------------|-------------------------------------------------------------------------------------------------------------------------------------|------------------------|------------------------------------------------------------------------------------------------------------------------------|----------------|-------------------------------------------------------------------------------------------------------|
| NCT04305106 | Bevacizumab in Severe or Critically Severe Patients With COVID-19 Pneumonia-RCT                                                     | Recruiting             | Drug: Bevacizumab                                                                                                            | Interventional | <a href="https://ClinicalTrials.gov/show/NCT04305106">https://ClinicalTrials.gov/show/NCT04305106</a> |
| NCT04372589 | Antithrombotic Therapy to Ameliorate Complications of COVID-19 ( ATTACC )                                                           | Recruiting             | Drug: Heparin                                                                                                                | Interventional | <a href="https://ClinicalTrials.gov/show/NCT04372589">https://ClinicalTrials.gov/show/NCT04372589</a> |
| NCT04493307 | The Evaluation of Hemostasis in Hospitalized COVID-19 Patients                                                                      | Recruiting             | Diagnostic Test: Phlebotomy                                                                                                  | Observational  | <a href="https://ClinicalTrials.gov/show/NCT04493307">https://ClinicalTrials.gov/show/NCT04493307</a> |
| NCT04514627 | Neuromodulation With Percutaneous Electrical Nerve Field Stimulation for Adults With COVID-19                                       | Recruiting             | Device: Auricular percutaneous neurostimulation                                                                              | Interventional | <a href="https://ClinicalTrials.gov/show/NCT04514627">https://ClinicalTrials.gov/show/NCT04514627</a> |
| NCT04487990 | CoV-Hep Study: Regional Anticoagulation Modalities in Continuous Venous Venous Hemodialysis in Patients With COVID-19               | Recruiting             | Drug: unfractionated Heparin                                                                                                 | Interventional | <a href="https://ClinicalTrials.gov/show/NCT04487990">https://ClinicalTrials.gov/show/NCT04487990</a> |
| NCT04371289 | Predictors of Cardiovascular Risk in Covid-19 Patients During Acute Disease and at Short Term Follow-up                             | Not yet recruiting     | N.A.                                                                                                                         | Observational  | <a href="https://ClinicalTrials.gov/show/NCT04371289">https://ClinicalTrials.gov/show/NCT04371289</a> |
| NCT04508439 | Effect of the Use of Anticoagulant Therapy During Hospitalization and Discharge in Patients With COVID-19 Infection                 | Recruiting             | Drug: Enoxaparin                                                                                                             | Interventional | <a href="https://ClinicalTrials.gov/show/NCT04508439">https://ClinicalTrials.gov/show/NCT04508439</a> |
| NCT04275414 | Bevacizumab in Severe or Critical Patients With COVID-19 Pneumonia                                                                  | Recruiting             | Drug: Bevacizumab Injection                                                                                                  | Interventional | <a href="https://ClinicalTrials.gov/show/NCT04275414">https://ClinicalTrials.gov/show/NCT04275414</a> |
| NCT04394195 | sFlt1: a Biomarker of Organ Dysfunction in Critically-ill Patients With COVID-19?                                                   | Recruiting             | Other: measurement of circulating sFlt1 concentration                                                                        | Observational  | <a href="https://ClinicalTrials.gov/show/NCT04394195">https://ClinicalTrials.gov/show/NCT04394195</a> |
| NCT04367792 | Cardiac Injury in COVID-19: a Pathology Study                                                                                       | Active, not recruiting | N.A.                                                                                                                         | Observational  | <a href="https://ClinicalTrials.gov/show/NCT04367792">https://ClinicalTrials.gov/show/NCT04367792</a> |
| NCT04403607 | Cardiac Imaging in SARS-CoV-2 (COVID-19)                                                                                            | Recruiting             | N.A.                                                                                                                         | Observational  | <a href="https://ClinicalTrials.gov/show/NCT04403607">https://ClinicalTrials.gov/show/NCT04403607</a> |
| NCT04444609 | PROSAIC-19 - Prospective Longitudinal Assessment in a COVID-19 Infected Cohort                                                      | Not yet recruiting     | Other: Blood tests sputum, nasal lavage and brushing                                                                         | Observational  | <a href="https://ClinicalTrials.gov/show/NCT04444609">https://ClinicalTrials.gov/show/NCT04444609</a> |
| NCT04457609 | Administration of Allogenic UC-MSCs as Adjuvant Therapy for Critically-Ill COVID-19 Patients                                        | Recruiting             | Drug: Oseltamivir Drug: Azithromycin Biological: Umbilical Cord Mesenchymal Stem Cells                                       | Interventional | <a href="https://ClinicalTrials.gov/show/NCT04457609">https://ClinicalTrials.gov/show/NCT04457609</a> |
| NCT04412473 | COVID-19 Respiratory Distress and Antithrombotic Drugs in Subject's Habits                                                          | Recruiting             | N.A.                                                                                                                         | Observational  | <a href="https://ClinicalTrials.gov/show/NCT04412473">https://ClinicalTrials.gov/show/NCT04412473</a> |
| NCT04351711 | Immunological Profiling of Patients With COVID-19 in Respiratory Distress                                                           | Recruiting             | Other: Immunological profiling                                                                                               | Observational  | <a href="https://ClinicalTrials.gov/show/NCT04351711">https://ClinicalTrials.gov/show/NCT04351711</a> |
| NCT04356144 | Thrombomodulin-modified Thrombin Generation Assay (TGA-TM) in Patients With Critical Infections                                     | Recruiting             | Diagnostic Test: Thrombin Generation Assay (TGA) Diagnostic Test: Thrombomodulin Modified Thrombin Generation Assay (TGA-TM) | Observational  | <a href="https://ClinicalTrials.gov/show/NCT04356144">https://ClinicalTrials.gov/show/NCT04356144</a> |
| NCT04401150 | Lessening Organ Dysfunction With VITamin C - COVID-19                                                                               | Recruiting             | Drug: Vitamin C Drug: Control                                                                                                | Interventional | <a href="https://ClinicalTrials.gov/show/NCT04401150">https://ClinicalTrials.gov/show/NCT04401150</a> |
| NCT04466241 | Combination Therapies to Reduce Carriage of SARS-Cov-2 and Improve Outcome of COVID-19 in Ivory Coast: a Phase Randomized Iib Trial | Not yet recruiting     | Drug: Lopinavir/Ritonavir 200 MG-50 MG Oral Tablet Drug: Telmisartan 40Mg Oral Tablet Drug: Atorvastatin 20 Mg Oral Tablet   | Interventional | <a href="https://ClinicalTrials.gov/show/NCT04466241">https://ClinicalTrials.gov/show/NCT04466241</a> |
| NCT04388683 | Inhaled Nitric Oxide for Preventing Progression in COVID-19                                                                         | Recruiting             | Drug: Nitric Oxide                                                                                                           | Interventional | <a href="https://ClinicalTrials.gov/show/NCT04388683">https://ClinicalTrials.gov/show/NCT04388683</a> |
| NCT04338828 | Nitric Oxide Inhalation Therapy for COVID-19 Infections in the ED                                                                   | Recruiting             | Drug: Nitric Oxide Gas Other: Inhaled Supplemental Oxygen                                                                    | Interventional | <a href="https://ClinicalTrials.gov/show/NCT04338828">https://ClinicalTrials.gov/show/NCT04338828</a> |

|             |                                                                                                                                               |                        |                                                                                       |                |                                                                                                       |
|-------------|-----------------------------------------------------------------------------------------------------------------------------------------------|------------------------|---------------------------------------------------------------------------------------|----------------|-------------------------------------------------------------------------------------------------------|
| NCT04361786 | Acral Cutaneous Thrombotic Vasculopathy and Covid-19 Infection                                                                                | Active, not recruiting | N.A.                                                                                  | Observational  | <a href="https://ClinicalTrials.gov/show/NCT04361786">https://ClinicalTrials.gov/show/NCT04361786</a> |
| NCT04299152 | Stem Cell Educator Therapy Treat the Viral Inflammation in COVID-19                                                                           | Not yet recruiting     | Combination Product: Stem Cell Educator-Treated Mononuclear Cells Apheresis           | Interventional | <a href="https://ClinicalTrials.gov/show/NCT04299152">https://ClinicalTrials.gov/show/NCT04299152</a> |
| NCT04338932 | COVID-19 and Deep Venous Thrombosis                                                                                                           | Completed              | N.A.                                                                                  | Observational  | <a href="https://ClinicalTrials.gov/show/NCT04338932">https://ClinicalTrials.gov/show/NCT04338932</a> |
| NCT04383002 | High Dose Inhaled Nitric Oxide for COVID-19 (ICU Patients)                                                                                    | Not yet recruiting     | Drug: Nitric Oxide                                                                    | Interventional | <a href="https://ClinicalTrials.gov/show/NCT04383002">https://ClinicalTrials.gov/show/NCT04383002</a> |
| NCT04460183 | A Study to Assess Efficacy and Safety of RESP301 Plus Standard of Care (SOC) Compared to SOC Alone in Hospitalized Participants With COVID-19 | Not yet recruiting     | Drug: RESP301, a Nitric Oxide generating solution Other: Standard of Care             | Interventional | <a href="https://ClinicalTrials.gov/show/NCT04460183">https://ClinicalTrials.gov/show/NCT04460183</a> |
| NCT04398290 | iNOPulse for COVID-19                                                                                                                         | Not yet recruiting     | Drug: Inhaled nitric oxide (iNO) Drug: Nitrogen gas Drug: Oxygen gas                  | Interventional | <a href="https://ClinicalTrials.gov/show/NCT04398290">https://ClinicalTrials.gov/show/NCT04398290</a> |
| NCT04507867 | Effect of a Nss to Reduce Complications in Patients With Covid-19 and Comorbidities in Stage III                                              | Not yet recruiting     | Dietary Supplement: Nutritional support system (NSS) Other: Control                   | Interventional | <a href="https://ClinicalTrials.gov/show/NCT04507867">https://ClinicalTrials.gov/show/NCT04507867</a> |
| NCT04399798 | Baricitinib for coRona Virus pnEumonia (COVID-19): a THERapeutic Trial                                                                        | Not yet recruiting     | Drug: Baricitinib                                                                     | Interventional | <a href="https://ClinicalTrials.gov/show/NCT04399798">https://ClinicalTrials.gov/show/NCT04399798</a> |
| NCT04456088 | Inhaled NO for the Treatment of COVID-19 Caused by SARS-CoV-2 (CANADA Trial)                                                                  | Not yet recruiting     | 150 ppm Nitric Oxide; 80 ppm Nitric Oxide (delivered through LungFit Delivery System) | Interventional | <a href="https://ClinicalTrials.gov/show/NCT04456088">https://ClinicalTrials.gov/show/NCT04456088</a> |
| NCT04397692 | Inhaled NO for the Treatment of COVID-19 Caused by SARS-CoV-2 (US Trial)                                                                      | Recruiting             | Device: Nitric Oxide delivered via LungFit, N <sub>2</sub> system                     | Interventional | <a href="https://ClinicalTrials.gov/show/NCT04397692">https://ClinicalTrials.gov/show/NCT04397692</a> |
| NCT04321616 | The Efficacy of Different Anti-viral Drugs in COVID 19 Infected Patients                                                                      | Recruiting             | Drug: Hydroxychloroquine Drug: Remdesivir Other: (Standard of Care) SoC               | Interventional | <a href="https://ClinicalTrials.gov/show/NCT04321616">https://ClinicalTrials.gov/show/NCT04321616</a> |
| NCT04390022 | Sars-CoV-2/COVID-19 Ivermectin Navarra-ISGlobal Trial                                                                                         | Recruiting             | Drug: Ivermectin Drug: Placebo                                                        | Interventional | <a href="https://ClinicalTrials.gov/show/NCT04390022">https://ClinicalTrials.gov/show/NCT04390022</a> |
| NCT04476992 | Nitric Oxide Therapy for COVID-19 Patients With Oxygen Requirement                                                                            | Recruiting             | Drug: Nitric Oxide-Sessions Drug: Nitric Oxide-Continuous and Sessions                | Interventional | <a href="https://ClinicalTrials.gov/show/NCT04476992">https://ClinicalTrials.gov/show/NCT04476992</a> |
| NCT04305457 | Nitric Oxide Gas Inhalation Therapy for Mild/Moderate COVID-19                                                                                | Active, not recruiting | Drug: Nitric Oxide                                                                    | Interventional | <a href="https://ClinicalTrials.gov/show/NCT04305457">https://ClinicalTrials.gov/show/NCT04305457</a> |
| NCT04312243 | NO Prevention of COVID-19 for Healthcare Providers                                                                                            | Recruiting             | Drug: Inhaled nitric oxide gas                                                        | Interventional | <a href="https://ClinicalTrials.gov/show/NCT04312243">https://ClinicalTrials.gov/show/NCT04312243</a> |
| NCT04443868 | Nitric Oxide Releasing Solution to Treat and Prevent Exacerbation of Mild COVID-19 Infection                                                  | Not yet recruiting     | Drug: Nitric Oxide-Releasing Drug                                                     | Interventional | <a href="https://ClinicalTrials.gov/show/NCT04443868">https://ClinicalTrials.gov/show/NCT04443868</a> |
| NCT04337918 | Nitric Oxide Releasing Solutions to Prevent and Treat Mild/Moderate COVID-19 Infection                                                        | Recruiting             | Drug: NORS (Nitric Oxide Releasing Solution)                                          | Interventional | <a href="https://ClinicalTrials.gov/show/NCT04337918">https://ClinicalTrials.gov/show/NCT04337918</a> |
| NCT04306393 | Nitric Oxide Gas Inhalation in Severe Acute Respiratory Syndrome in COVID-19                                                                  | Recruiting             | Drug: Nitric Oxide Gas                                                                | Interventional | <a href="https://ClinicalTrials.gov/show/NCT04306393">https://ClinicalTrials.gov/show/NCT04306393</a> |
| NCT04453527 | The CASCADE Study - Measures of Complement Activation and Inflammation in Patients With Covid-19                                              | Recruiting             | N.A.                                                                                  | Observational  | <a href="https://ClinicalTrials.gov/show/NCT04453527">https://ClinicalTrials.gov/show/NCT04453527</a> |
| NCT03331445 | Inhaled Gaseous Nitric Oxide (gNO) Antimicrobial Treatment of Difficult Bacterial and Viral Lung (COVID-19) Infections                        | Active, not recruiting | Drug: Nitric Oxide 0.5 % / Nitrogen 99.5 % Gas for Inhalation                         | Interventional | <a href="https://ClinicalTrials.gov/show/NCT03331445">https://ClinicalTrials.gov/show/NCT03331445</a> |
| NCT04304313 | A Pilot Study of Sildenafil in COVID-19                                                                                                       | Recruiting             | Drug: Sildenafil citrate tablets 0.1g/day for 14 days                                 | Interventional | <a href="https://ClinicalTrials.gov/show/NCT04304313">https://ClinicalTrials.gov/show/NCT04304313</a> |
